# Supplementary material for: Superelectrophilic activation of polyfunctional organic compounds using zeolites and other solid acidsElectronic supplementary information (ESI) available: experimental details, including activation of solid acids and typical procedure. See http://www.rsc.org/suppdata/cc/b4/b404074k/
Source: Royal Society of Chemistry journal article supplement (doi:10.1039/b404074k), 2004-01-01
Supplement: b404074k.doc [file b404074k.doc]

Superelectrophilic activation of polyfunctional organic compounds using zeolites and other solid acids

Konstantin Yu. Koltunov, Stéphane Walspurger, Jean Sommer

**Supplementary material**

# Experimental

## *Materials*

Amides **1-3** were prepared from the corresponding carboxylic acids by treatment with excess SOCl2, followed by quenching with aqueous ammonia or diethylamine.1 Compounds **4-7** as well as benzene and o-dichlorobenzene were purchased and used as received.

Zeolites USY (Si/Al = 4.5 obtained from UOP Company) and ZSM-5 (Si/Al = 25 obtained from PQ Zeolites B.V.) in NH4+ form were activated at 550°C under air. Sulfated zirconia promoted with alumina was synthesized following the procedure described previously2 and was activated at 450°C. Nafion deposited on mesoporous silica (SAC-13, Aldrich Chemicals) was activated for several hours at 200°C.

#### General experimental procedure

## All the reactions were performed in 15 mL pressure tubes. Typically, the pressure tube was charged with the activated solid acid (1 g), then with treated compound **1-7** (20 to 100 mg) and benzene or o-dichlorobenzene (3 mL). The obtained mixture was stirred at 25 °C for 5 min followed by stirring at 120 to 130 °C (benzene) or 190 °C (o-dichlorobenzene) for 1 to 70 h (TLC monitoring). To the resulting mixtures, after cooling, water (3 mL) and ether (5 mL) were introduced and the mixture was stirred for 1-3 hours. Organic layer was separated and similar extraction was repeated twice with new portions of ether.3 The combined organic phase was dried (Na2SO4) and concentrated in *vacuo* to provide the residue, which was separated (purified) by silica gel chromatography or recrystallized to obtain corresponding products. The latter were characterized by NMR data and melting points, which were comparable to those previously reported.4 The residual aqueous part was filtered of, washed with water and methanol to recover solid acids, which were reused (after activation at 450 °C for 2 h) without loss of activity.

### *References*

1. Ref 13.

2. W. Hua, A. Goeppert and J. Sommer, *J. Catal*. 2001, **197**, 406.

3. This isolation procedure was not optimised. Another procedure involves boiling the reaction mixture with wet 1,4-dioxane for 1 h, followed by filtration, drying of resulting solution (Na2SO4) and concentration in *vacuo* to obtain a crude product.

4. Ref 9 –18.
